# Supplementary material for: Mn3O4/reduced graphene oxide based supercapacitor with ultra-long cycling performance
Source: Royal Society of Chemistry journal article supplement (doi:10.1039/c7ta03319b), 2017-01-01
Supplement: c7ta03319b1.pdf [file c7ta03319b1.pdf]

## **Mn<sub>3</sub>O<sub>4</sub>/Reduced graphene oxide based supercapacitor with ultra-long cyclic performance**

Ting Xiong<sup>a,b</sup>, Wee Siang Vincent Lee<sup>a</sup>, Xiaolei Huang<sup>a</sup>, Jun Min Xue<sup>\* a</sup>

<sup>a</sup> National University of Singapore, Department of Materials Science and Engineering, Singapore 117573.

<sup>b</sup> Centre for Advanced 2D Materials and Graphene Research Centre, National University of Singapore, Singapore 117546.

\*To whom correspondence should be addressed. E-mail: [msexuejm@nus.edu.sg](mailto:msexuejm@nus.edu.sg) (Jun Min Xue). Tel./fax +65 65164655.

## **Materials and methods**

### **Chemicals**

MnCl<sub>2</sub>·4H<sub>2</sub>O (99.99%), sodium dodecyl sulfate (SDS) (≥ 98.5 %), sodium hydroxide (NaOH), were purchased from Sigma-Aldrich. Graphene oxide (GO, 5 mg mL<sup>-1</sup>) was purchased from graphene supermarket. Carbon Nano Tube (CNT, 10 mg mL<sup>-1</sup>) water dispersion was purchased from NanoAmor company. Distilled water and absolute ethanol were used in the experiments. The materials were used without further treatment.

### **Synthesis of Mn<sub>3</sub>O<sub>4</sub> nanoparticles**

In a typical synthesis procedure, sodium dodecyl sulfate (0.5 mmol) is firstly dissolved into 40 mL distilled water, and then MnCl<sub>2</sub>·4H<sub>2</sub>O (1 mmol) was dissolved into the above solution. Later, 10 mL of NaOH (0.5 mol L<sup>-1</sup>) was added dropwise into the above solution. Next, the resulting suspension was stirred for 24 h and then aged for another 1 h. The precipitates obtained was gathered, washed with water and ethanol for three times and dried at 80 °C for 12 h to obtain final samples without further treatment. Before electrochemical test, the Mn<sub>3</sub>O<sub>4</sub> nanoparticles were treated in a tube furnace (350 °C for 2 h under Ar and H<sub>2</sub>) to enhance the crystallinity.

### **Synthesis of Mn<sub>3</sub>O<sub>4</sub>/RGO film paper**

Briefly, certain Mn<sub>3</sub>O<sub>4</sub> nanoparticles (20 mg) were mixed with 12 mL of distilled water and sonicated for 20 min to get a stable solution. Then 8 mL GO aqueous (5 mg mL<sup>-1</sup>) was added into the above solution and sonicated for 20 min. The obtained suspension were transferred into a container with a mixed cellulose ester filter membrane in the bottle, and then the container was dried in vacuum under 60 °C to evaporate water, then peeled off to get a free-standing film paper. The dried film paper was annealed at 350 °C for 2 h under Ar and H<sub>2</sub> to reduce graphene oxide. The obtained products were labelled as MGP. As a reference, the pure reduced graphene oxide paper was fabricated under the same conditions except the addition of Mn<sub>3</sub>O<sub>4</sub> nanoparticles, which was denoted as RGP.

### **Synthesis of CNT/RGO film paper**

3 mL CNT ( $10 \text{ mg mL}^{-1}$ ), 6 mL GO aqueous ( $5 \text{ mg mL}^{-1}$ ) and 11 mL distilled water were mixed together and then sonicated for 20 min. Similarly, the obtained suspension was transferred into a container with a mixed cellulose ester filter membrane in the bottle, and then the container was put into an oven to evaporate water ( $60 \text{ }^\circ\text{C}$ ). The dried film paper was then reduced at potential of  $-1.5 \text{ V}$  for 10 h to reduce graphene oxide. The obtained product was denoted as CNP.

### **Characterization**

Scanning electron microscopy (SEM) images were recorded on a ZEISS SEM Supra 40 ( $5 \text{ kV}$ ). SEM samples were prepared by dripping the sample solutions onto a silicon substrate. Transmission electron microscopy (TEM) was done on a JEOL-3010 ( $300 \text{ kV}$  acceleration voltage). TEM samples were prepared by dripping the sample solutions onto a copper grid. The powder X-ray diffraction (XRD) pattern was measured by a powder diffractometer (Bruker D8 Advanced Diffractometer System) with a  $\text{Cu K}\alpha$  ( $1.5418 \text{ \AA}$ ) source. Raman spectrometry were conducted for MGP and CNP on a Horiba MicroRaman HR Evolution System using an argon laser beam with an excitation wavelength of  $514.5 \text{ nm}$ . Surface composition was analyzed by X-ray photoelectron spectroscopy (XPS) using a Kratos Analytical Axis UltraDLD UHV spectrometer with a monochromatized  $\text{Al K}\alpha$  X-ray source ( $1486.6 \text{ eV}$ ) scanning a spot size of  $700 \text{ }\mu\text{m}$  by  $300 \text{ }\mu\text{m}$ . Mass content was measured by thermal gravimetric analysis (SDT Q600).

### **Electrochemical measurements**

All electrochemical tests were performed at room temperature. Cyclic voltammetry and galvanostatic charge/discharge measurement were conducted using an electrochemical system (Bio-logic VMP 3). To test the electrode material of pure  $\text{Mn}_3\text{O}_4$ ,  $\text{Mn}_3\text{O}_4$  was mixed with polyvinylidene fluoride (PVDF), carbon black in a ratio of 8:1:1 with N-methyl-2-pyrrolidone (NMP). The mixture was hand-grinded for at least 10 min to obtain a slurry. The slurry was later coated onto carbon paper which served as a current collector. After heating at  $80 \text{ }^\circ\text{C}$  overnight, the carbon paper was cut to  $1 \text{ cm} \times 1 \text{ cm}$ . The as-prepared film papers were utilized directly as a free standing electrode without any binder, conductive additive, or electric conductor. In the three-electrode system, saturated calomel electrode was used as the reference

electrode, platinum plate was served as the counter electrode, and 1M Na<sub>2</sub>SO<sub>4</sub> was as the electrolyte. To test the electrode material of CNT/RGO film, CNT/RGO film was directly cut to 1 cm × 1 cm. The asymmetric supercapacitors were first characterized in a standard Swagelok 2-electrode cell configuration in 1M Na<sub>2</sub>SO<sub>4</sub> aqueous electrolyte. One piece of MGP (1 cm in diameter) positive electrode and one piece of CNP (1 cm in diameter) negative electrode were immersed into the 1 M Na<sub>2</sub>SO<sub>4</sub> aqueous. These two film electrodes were subsequently assembled together with a separator (normal filter paper) sandwiched in between. In order to evaluate the practical supercapacitor performance, the flexible asymmetric liquid-state supercapacitor was fabricated. The length and width of the films are 4 cm × 1 cm. For both CV and Charge/Discharge of full cell test, the measurement voltage was controlled in the range of 0 – 1.8 V for aqueous electrolyte test. Scan rates of 10, 25, 50, 100 and 200 mV s<sup>-1</sup> were used for CV, while the current densities of 0.1, 0.2, 0.5, 1, 2, 5, 10 and 20 A cm<sup>-3</sup> were used for Charge/Discharge measurement.

The total gravimetric or volumetric capacitance of a supercapacitor in Farads per gram or per cubic centimeter were calculated from the galvanostatic discharge process according to the following equation:

$$F = I \Delta t / \Delta V \quad (1)$$

Where I is the current density (A g<sup>-1</sup> or A cm<sup>-3</sup>), Δt is the discharge time (s), and ΔV is the potential difference (V).

Based on the total volume of the active materials from the positive and negative electrode, energy density (E) and power density (P) were calculated based on the following formula.

$$E = \int_{t_1}^{t_2} V \cdot I \cdot t \, dt / 3.6 \quad (2)$$

$$P = 3600 E / \Delta t \quad (3)$$

Where V is the cell potential (V), I is the current density (A cm<sup>-3</sup>), t is the time (s), t<sub>1</sub> is the time which the cell is fully discharged, t<sub>2</sub> is the time which the cell is fully charged, Δt is the discharge time (s).

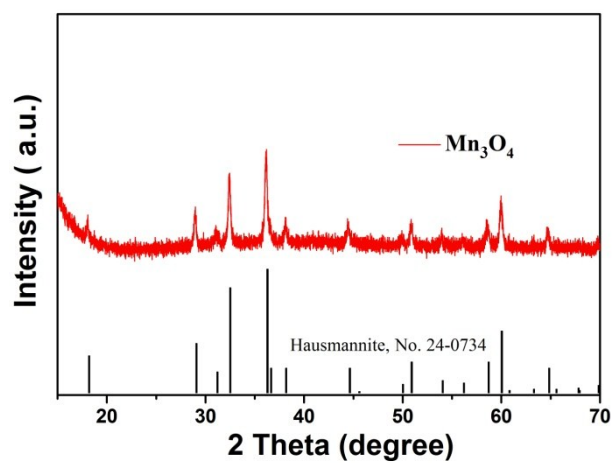

Fig. S1 XRD patterns of the obtained pure  $\text{Mn}_3\text{O}_4$ .

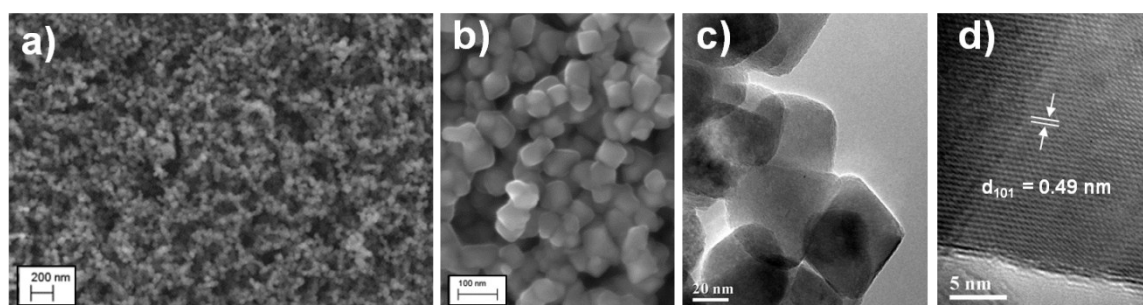

Fig. S2 a) and b) SEM images and c) and d) TEM images of the  $\text{Mn}_3\text{O}_4$  nanoparticles.

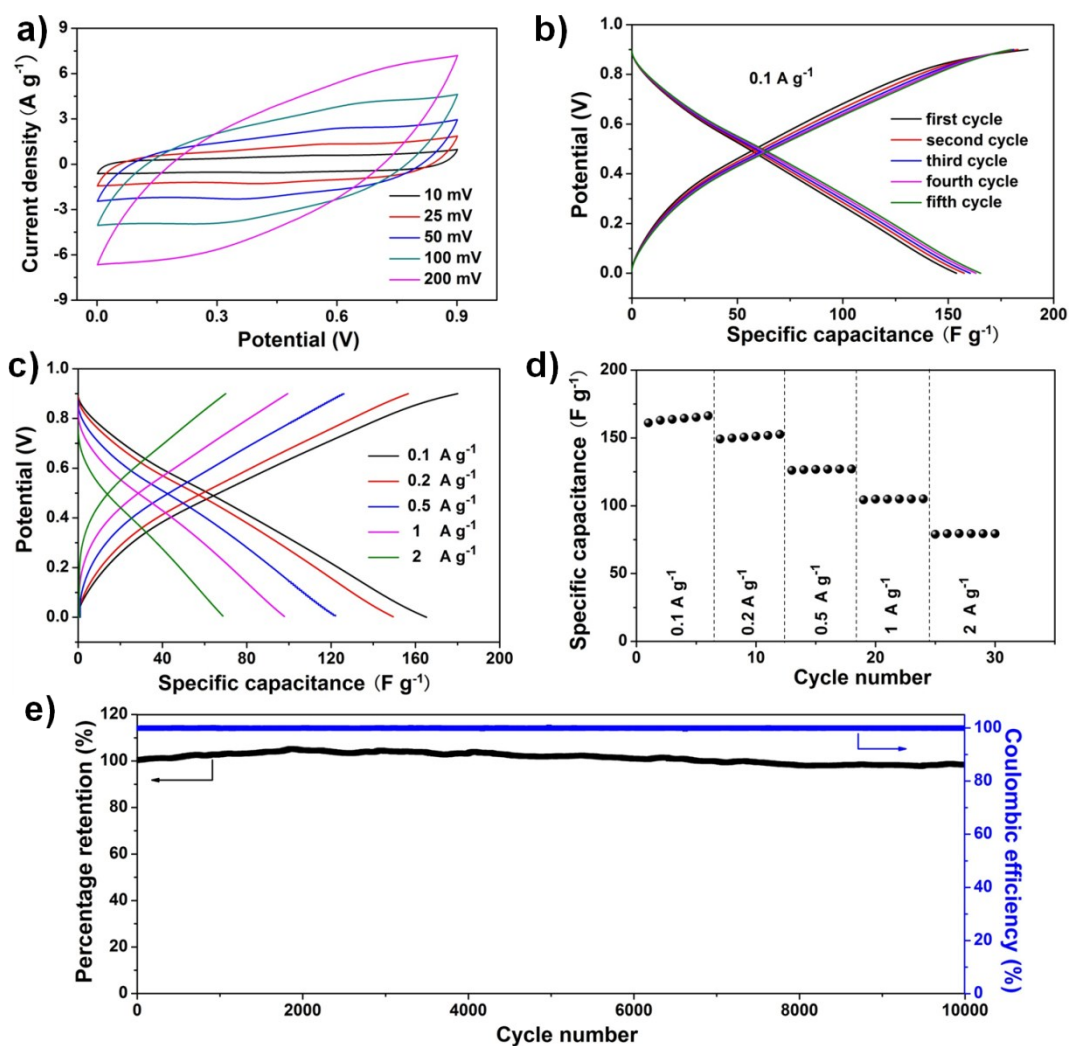

Fig. S3 Electrochemical performance of Mn<sub>3</sub>O<sub>4</sub> nanoparticles in a three-electrode configuration with 1 M Na<sub>2</sub>SO<sub>4</sub> as the aqueous electrolyte. a) CV curve at various scan rates; b) galvanostatic charge/discharge profiles at 0.1 A g<sup>-1</sup>; c) galvanostatic charge/discharge profiles at different current densities 0.1 – 2 A g<sup>-1</sup>; d) the rate performance at different current densities; e) the cyclic stability and coulombic efficiency at 1 A g<sup>-1</sup>.

Table S1. Summary of supercapacitor performance parameters for  $\text{Mn}_3\text{O}_4$  nanoparticles prepared by other methods.

| Preparation method            | Electrolyte                  | Potential window | Capacitance retention   | references |
|-------------------------------|------------------------------|------------------|-------------------------|------------|
| hydrothermal method           | 1 M $\text{Na}_2\text{SO}_4$ | -0.2–0.8 V       | 72.7% after 1000 cycles | 1          |
| hydrothermal method           | 1 M $\text{Na}_2\text{SO}_4$ | 0 – 1 V          | 70% after 1000 cycles   | 2          |
| hydrothermal method           | 1 M $\text{Na}_2\text{SO}_4$ | 0 – 1V           | 78% after 5000 cycles   | 3          |
| hydrothermal method           | 1 M $\text{Na}_2\text{SO}_4$ | -0.4 – 0.6 V     | 88% after 1000 cycles   | 4          |
| chemical precipitation method | 1 M $\text{Na}_2\text{SO}_4$ | -0.1 – 0.9 V     | 77% after 1000 cycles   | 5          |
| a polyol method               | 1 M $\text{Na}_2\text{SO}_4$ | -0.2 – 0.8 V     | 71.4% after 1500 cycles | 6          |
| air oxidation method          | 1M $\text{Na}_2\text{SO}_4$  | 0 – 0.9 V        | 100% after 10000 cycles | this work  |

These electrochemical tests were all performed in three electrode configurations.

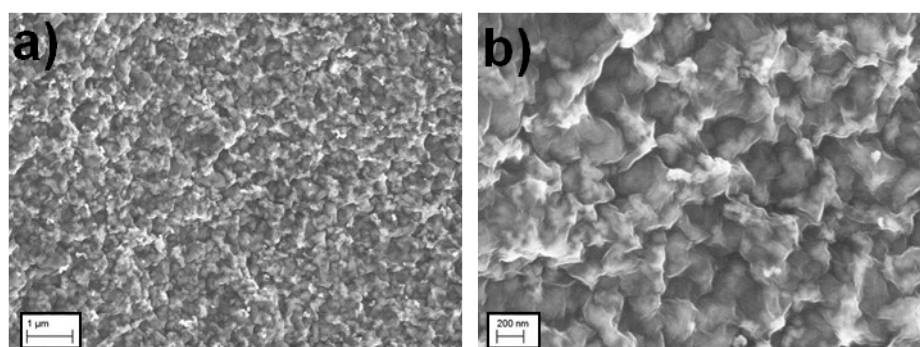

Fig. S4 SEM images of the surface structure of MGP.

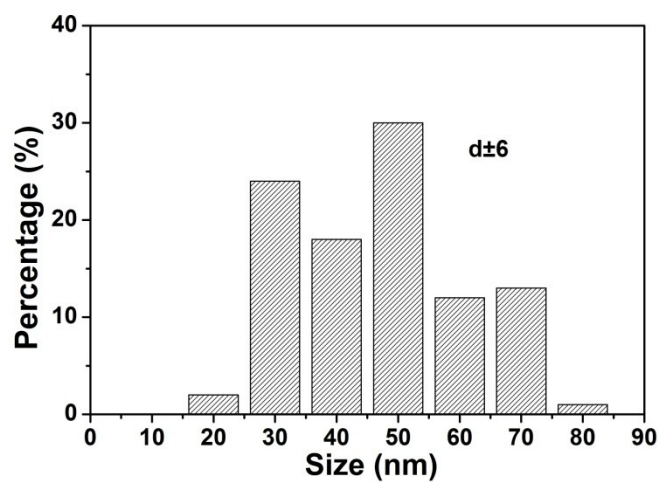

Fig. S5 The size distribution of Mn<sub>3</sub>O<sub>4</sub> nanoparticles in MGP.

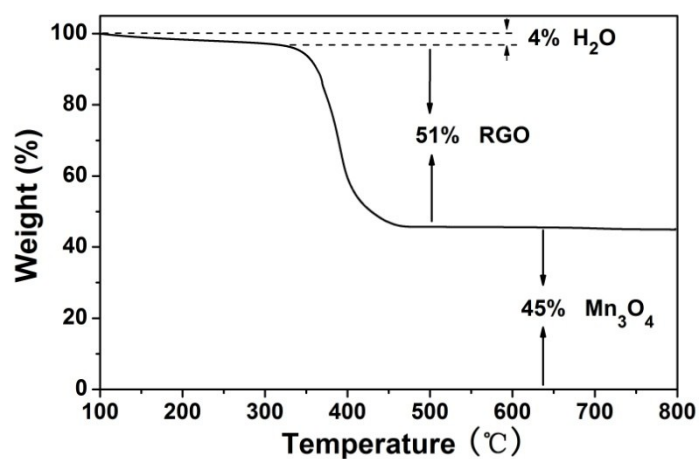

Fig. S6 DSC-TGA gravimetric analysis of MGP film paper to determine the weight percentage of Mn<sub>3</sub>O<sub>4</sub> and RGO.

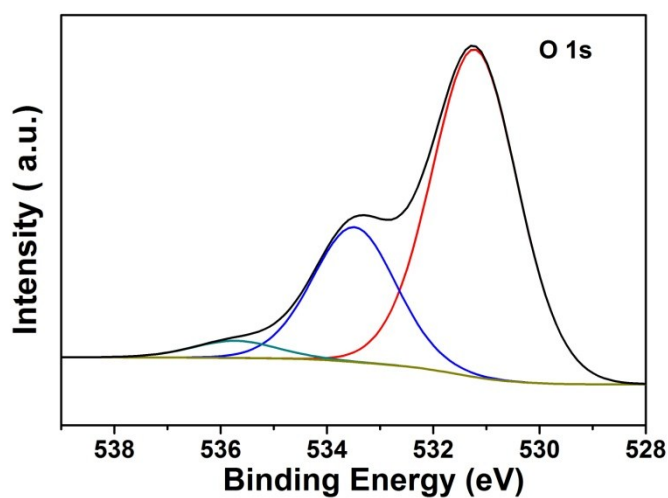

Fig. S7 XPS spectrum (O 1s) of MGP.



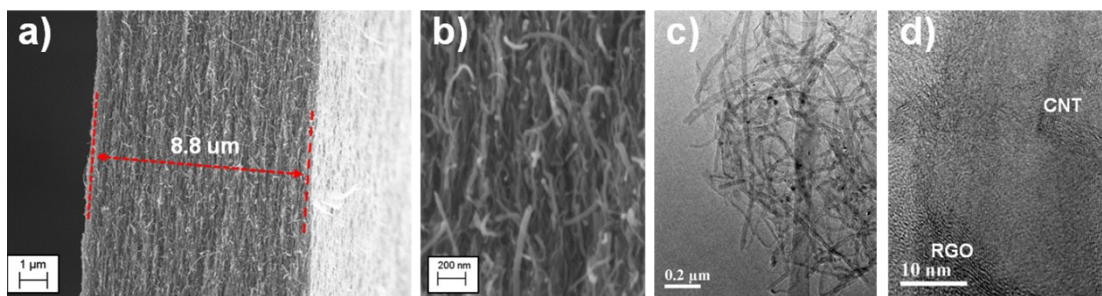

Fig. S8 a), b) SEM images and c), d) TEM images of the prepared CNP.

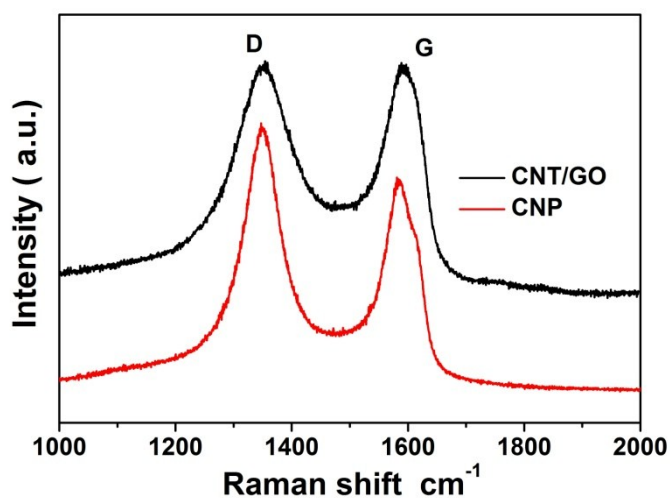

Fig. S9 Raman spectra for CNT/GO and CNP.

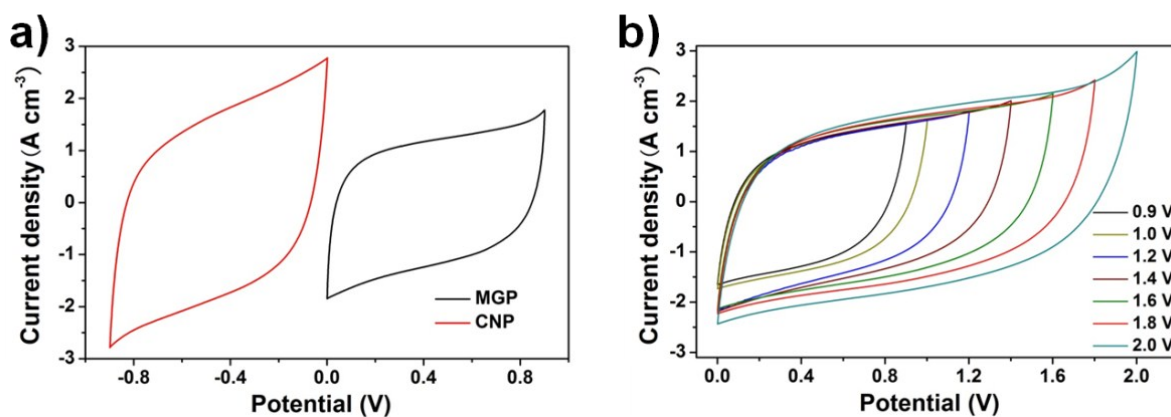

Fig. S10 a) CV curves of MGP and CNP tested separately in 1M  $\text{Na}_2\text{SO}_4$  aqueous electrolyte conducted at  $25 \text{ mV s}^{-1}$ , b) CV curves of the MGP/CNP asymmetric supercapacitor in the range of 0.9-2.0 V.

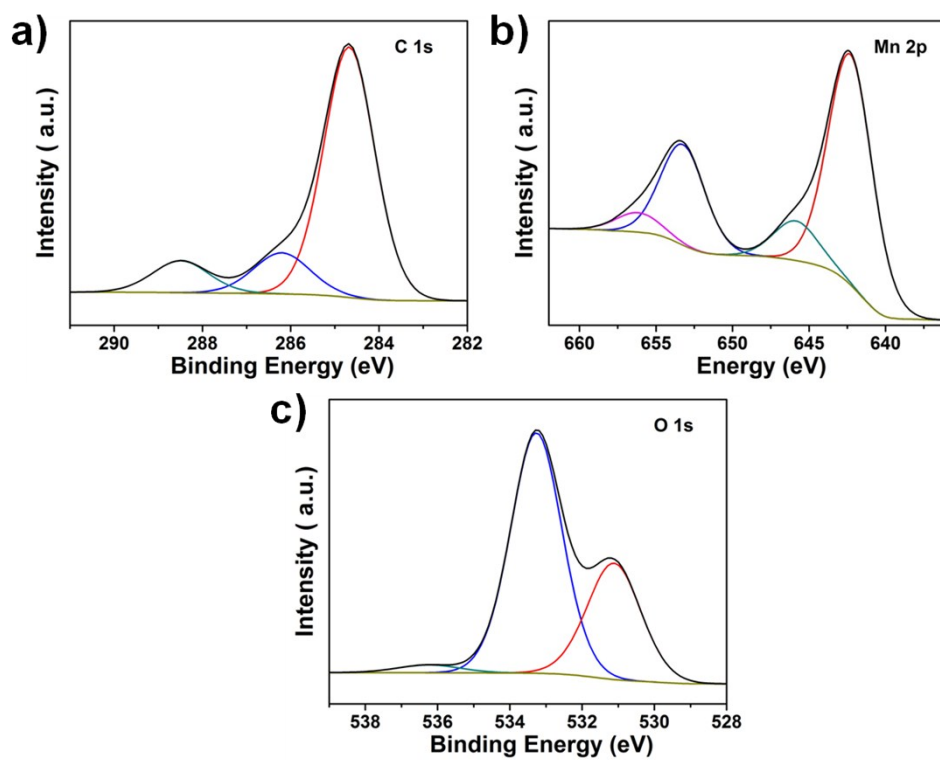

Fig. S11 XPS spectra of MGP after cyclic test. a) C 1s, b) Mn 2p and c) O 1s region.

Table S2. Summary of the supercapacitor performance parameters for Mn<sub>3</sub>O<sub>4</sub>-based materials.

| Samples                                                 | Electrolytes                             | Potential window | Capacitance             | Max Energy density        | Max Power density         | Capacitance retention           | References |
|---------------------------------------------------------|------------------------------------------|------------------|-------------------------|---------------------------|---------------------------|---------------------------------|------------|
| Mn <sub>3</sub> O <sub>4</sub> /graphene paper          | Potassium polyacrylate /KCl              | 0–1.8 V          | 72.6 F g <sup>-1</sup>  | 32.7 Wh kg <sup>-1</sup>  | 9.0 kW kg <sup>-1</sup>   | 86.0% after 10000 cycles        | 7          |
| Mn <sub>3</sub> O <sub>4</sub> /carbon nanofibers       | 1 M Na <sub>2</sub> SO <sub>4</sub>      | 0–1.8V           | Not reported            | 18 Wh kg <sup>-1</sup>    | 12 kW kg <sup>-1</sup>    | 94 % after 5000 cycles          | 8          |
| Mn <sub>3</sub> O <sub>4</sub> /Carbon nanotubes        | 0.5 M Na <sub>2</sub> SO <sub>4</sub>    | 0–2 V            | 25 F g <sup>-1</sup>    | 26.6 Wh kg <sup>-1</sup>  | 5.6 kW kg <sup>-1</sup>   | 103.9% after 1000 cycles        | 9          |
| Mn <sub>3</sub> O <sub>4</sub> @nitrogen-doped graphene | EMIMBF <sub>4</sub>                      | 0–4 V            | 56 F g <sup>-1</sup>    | 124.4 Wh kg <sup>-1</sup> | 29.9 kW kg <sup>-1</sup>  | 82.4% after 10000 cycles (3.5V) | 10         |
| graphene/Mn <sub>3</sub> O <sub>4</sub> composites      | Saturated K <sub>2</sub> SO <sub>4</sub> | 0–1 V            | 63 F g <sup>-1</sup>    | 8.7 Wh kg <sup>-1</sup>   | 1.0 kW kg <sup>-1</sup>   | 94 % after 1000 cycles          | 11         |
| Mn <sub>3</sub> O <sub>4</sub> grown Ni/graphite/paper  | Poly(vinyl alcohol)/NaOH gel             | 0–1.3 V          | 3.05 F cm <sup>-3</sup> | 0.35 mWh cm <sup>-3</sup> | 0.0325 W cm <sup>-3</sup> | 83.3 % after 12000 cycles       | 12         |
| Mn <sub>3</sub> O <sub>4</sub> /rGO film                | 1 M Na <sub>2</sub> SO <sub>4</sub>      | 0–2 V            | 54.6 F cm <sup>-3</sup> | 5.5 mWh cm <sup>-3</sup>  | 6.86 W cm <sup>-3</sup>   | 95% after 6000 cycles           | 13         |
| Mn <sub>3</sub> O <sub>4</sub> /rGO film paper          | 1 M Na <sub>2</sub> SO <sub>4</sub>      | 0–1.8 V          | 52.2 F cm <sup>-3</sup> | 18 mWh cm <sup>-3</sup>   | 3.13 W cm <sup>-3</sup>   | 115% after 60000 cycles         | this work  |

These electrochemical tests were all performed in full cell configurations.

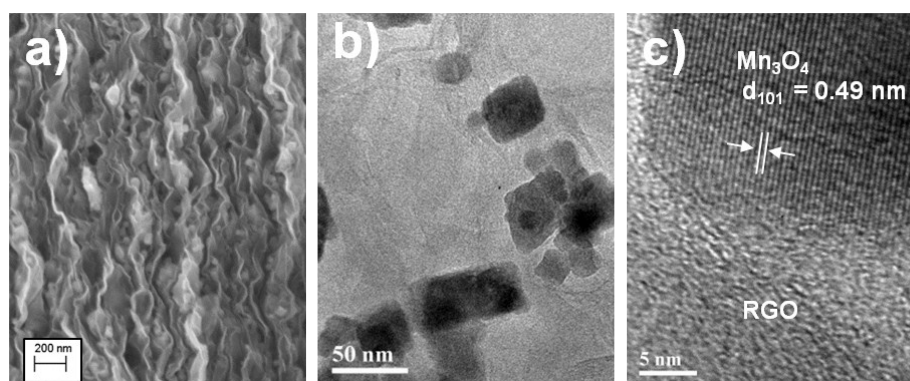

Fig. S12 a) SEM and b), c) TEM images of the MGP after cyclic test.

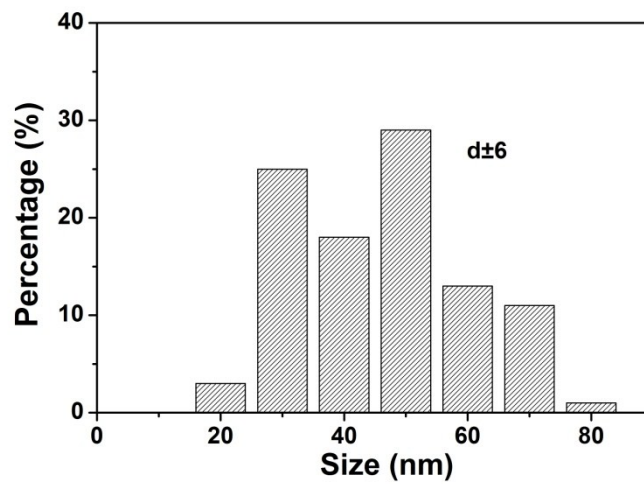

Fig. S13 The size distribution of  $\text{Mn}_3\text{O}_4$  nanoparticles in MGP after cyclic test.

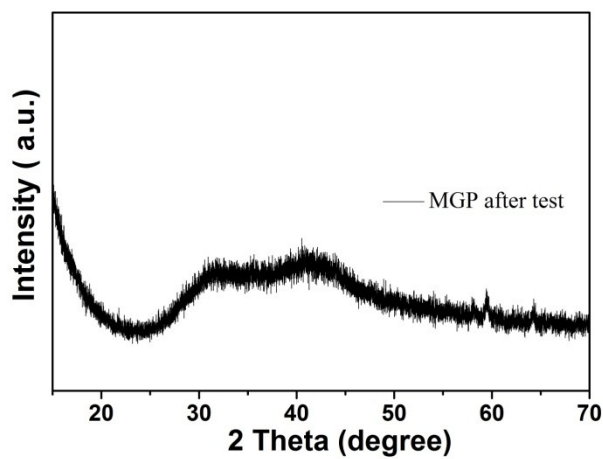

Fig. S14 XRD patterns of the MGP after cyclic test.

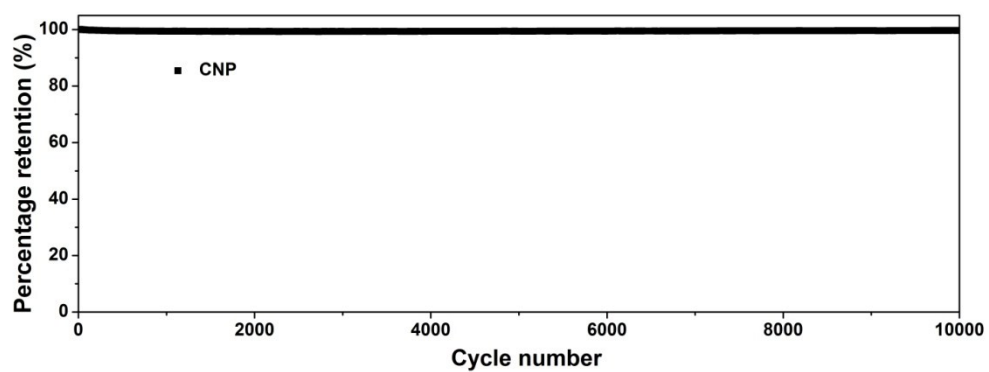

Fig. S15 The cyclic stability of CNP tested in a three-electrode configuration with 1 M  $\text{Na}_2\text{SO}_4$  as the aqueous electrolyte at  $5 \text{ A cm}^{-3}$ .

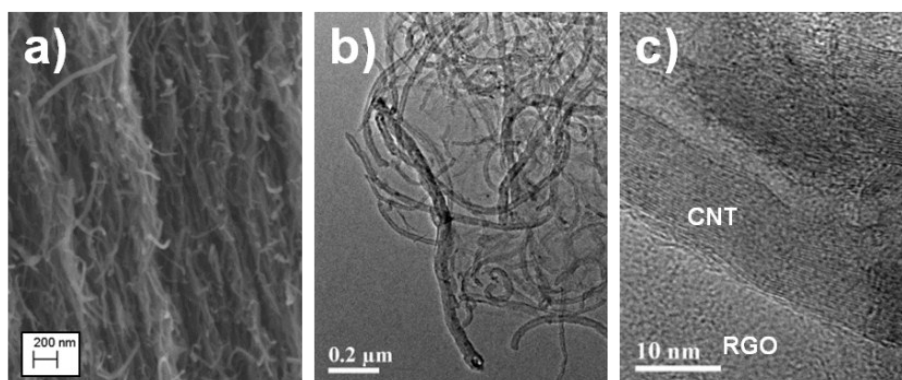

Fig. S16 a) SEM and b), c) TEM images of the CNP after cyclic test.

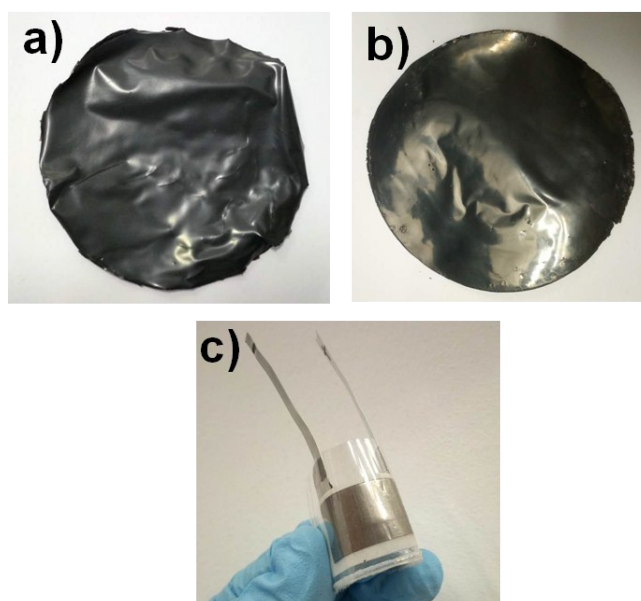

Fig. S17 a) a picture of MGP; b) a picture of CNP; c) optical photographs of the fabricated flexible liquid-state supercapacitor device with electrode area of  $4\text{ cm} \times 1\text{ cm}$ .

## References

- 1 Y. Wu, S. Liu, H. Wang, X. Wang, X. Zhang and G. Jin, *Electrochim. Acta*, 2013, **90**, 210–218.
- 2 R. Dong, Q. Ye, L. Kuang, X. Lu, Y. Zhang, X. Zhang, G. Tan, Y. Wen and F. Wang, *ACS Appl. Mater. Interfaces*, 2013, **5**, 9508–9516.
- 3 F. Yang, M. Zhao, Q. Sun and Y. Qiao, *RSC Adv.*, 2015, **5**, 9843–9847.
- 4 C. Mondal, D. Ghosh, T. Aditya, A. K. Sasmal and T. Pal, *New J. Chem.*, 2015, **39**, 8373–8380.
- 5 B. G. S. Raj, A. M. Asiri, J. J. Wu and S. Anandan, *J. Alloys Compd.*, 2015, **636**, 234–240.
- 6 G. Jin, X. Xiao, S. Li, K. Zhao, Y. Wu, D. Sun and F. Wang, *Electrochim. Acta*, 2015, **178**, 689–698.
- 7 H. Gao, F. Xiao, C. B. Ching and H. Duan, *ACS Appl. Mater. Interfaces*, 2012, **4**, 7020–7026.
- 8 H. Wang, J. Deng, Y. Chen, F. Xu, Z. Wei and Y. Wang, *Nano Res.*, 2016, **9**, 2672–2680.
- 9 H. Cheng, H. M. Duong and D. Jewell, *RSC Adv.*, 2016, **6**, 36954–36960.
- 10 L. Liu, L. Su, J. Lang, B. Hu, S. Xu and X. Yan, *J. Mater. Chem. A*, 2017, **5**, 5523–5531.
- 11 F. Gao, J. Qu, Z. Zhao, Q. Zhou, B. Li and J. Qiu, *Carbon*, 2014, **80**, 640–650.
- 12 J. Feng, S. Ye, X. Lu, Y. Tong and G. Li, *ACS Appl. Mater. Interfaces*, 2015, **7**, 11444–11451.
- 13 Y. Hu, C. Guan, G. Feng, Q. Ke, X. Huang and J. Wang, *Adv. Funct. Mater.*, 2015, **25**, 7291–7299.
